# Supplementary material
Source: PubMed Central journal article supplement (PMC4580160)
Supplement: JVI.01495-15_zjv999090889so1.pdf [file JVI.01495-15_zjv999090889so1.pdf]

# Supplemental Material

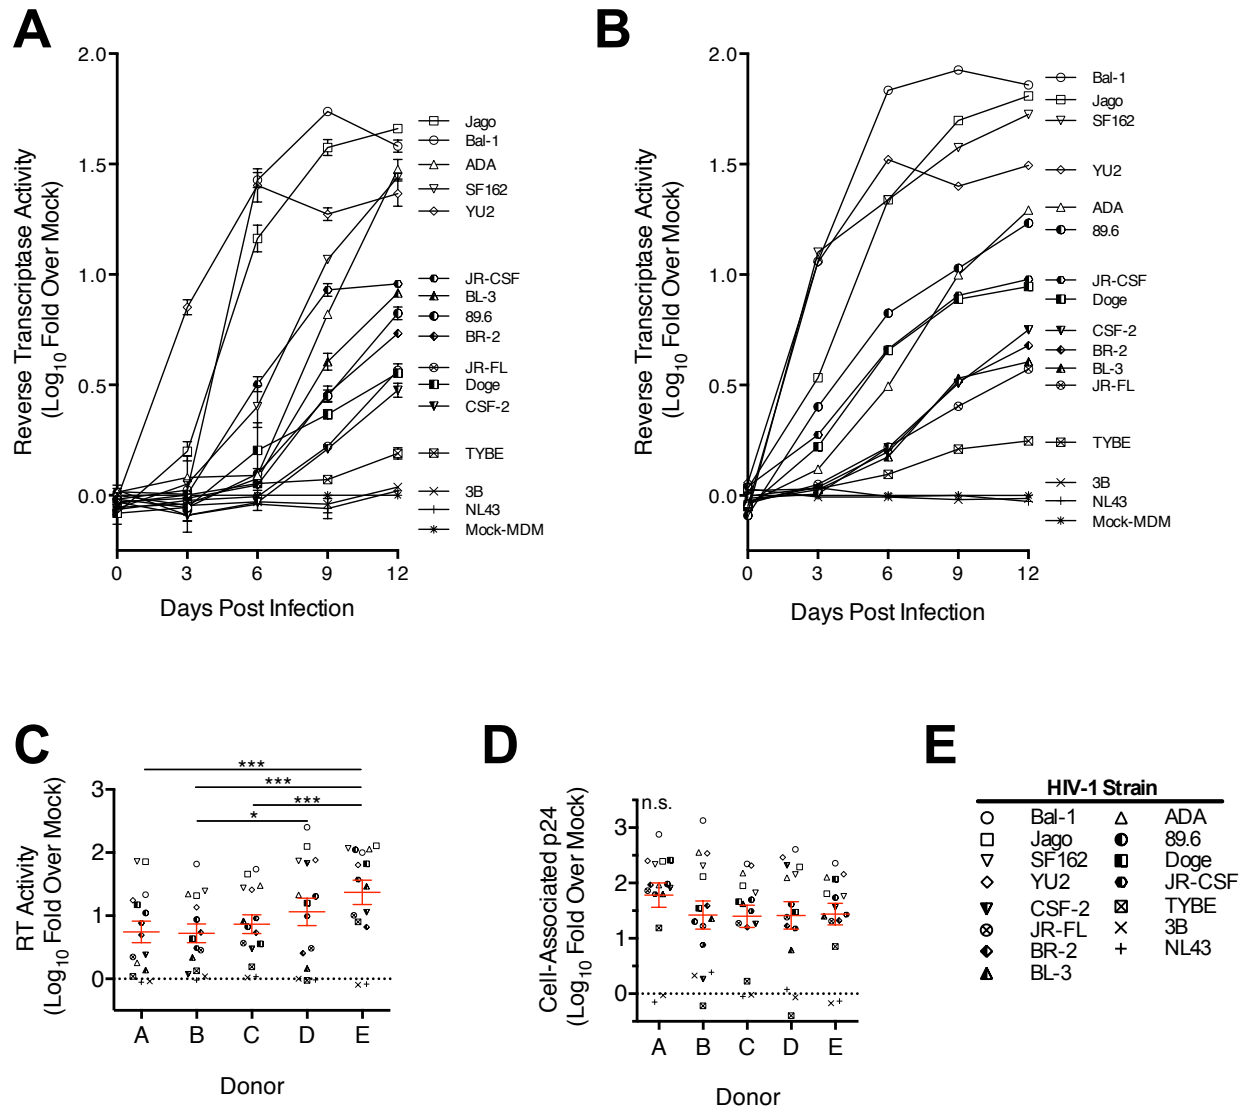

**Supplemental Figure 1: HIV-1 strain replication in primary human macrophages from different donors.** Replication of fifteen HIV-1 viral strains (inoculum 25ng p24 per 400,000 cells) in monocyte-derived macrophages (MDM) isolated from five healthy donors was assessed every 3 days over 12 days of infection by supernatant reverse transcriptase (RT) activity. **A**) Supernatant RT activity in Donor C over the course of infection normalized to Mock-MDM background. Values represent mean  $\pm$  SEM. **B**) Average supernatant RT activity in all five donors over the course of infection normalized to Mock-MDM background. Errors bars are not shown for clarity. **C**) Day 12 supernatant RT activity in all 5 donors stratified by donor normalized to uninfected/ Mock macrophages. **D**) Day 12 HIV-MDM lysate p24 content in all five donors stratified by donor as assessed by Western blot. **E**) Key for HIV strain symbols. Error bars indicate mean  $\pm$  SEM. Statistical comparisons to between donors were made by two-way ANOVA with Holm-Sidak post hoc test. \*  $p < 0.05$ , \*\*\* $p < 0.001$

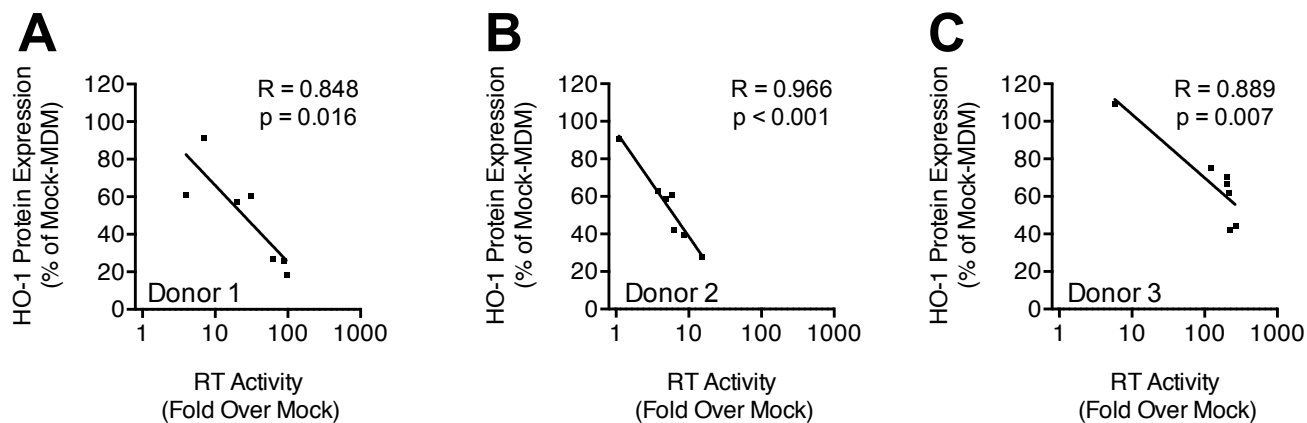

**Supplemental Figure 2: Replication level of an HIV-1 strain in different donor MDM predicts HO-1 protein loss.** MDM from three independent donors were infected with a range of inoculum (0.2 to 50ng/ml HIV p24 per  $4 \times 10^5$  cells) and viral replication by supernatant RT activity and MDM HO-1 protein expression normalized to GAPDH by Western blot were determined. **A-C)** Correlation between day 12 post infection HO-1 protein expression and RT activity for each donor. Correlations were assessed by Pearson's correlation with line of best fit determined by linear regression

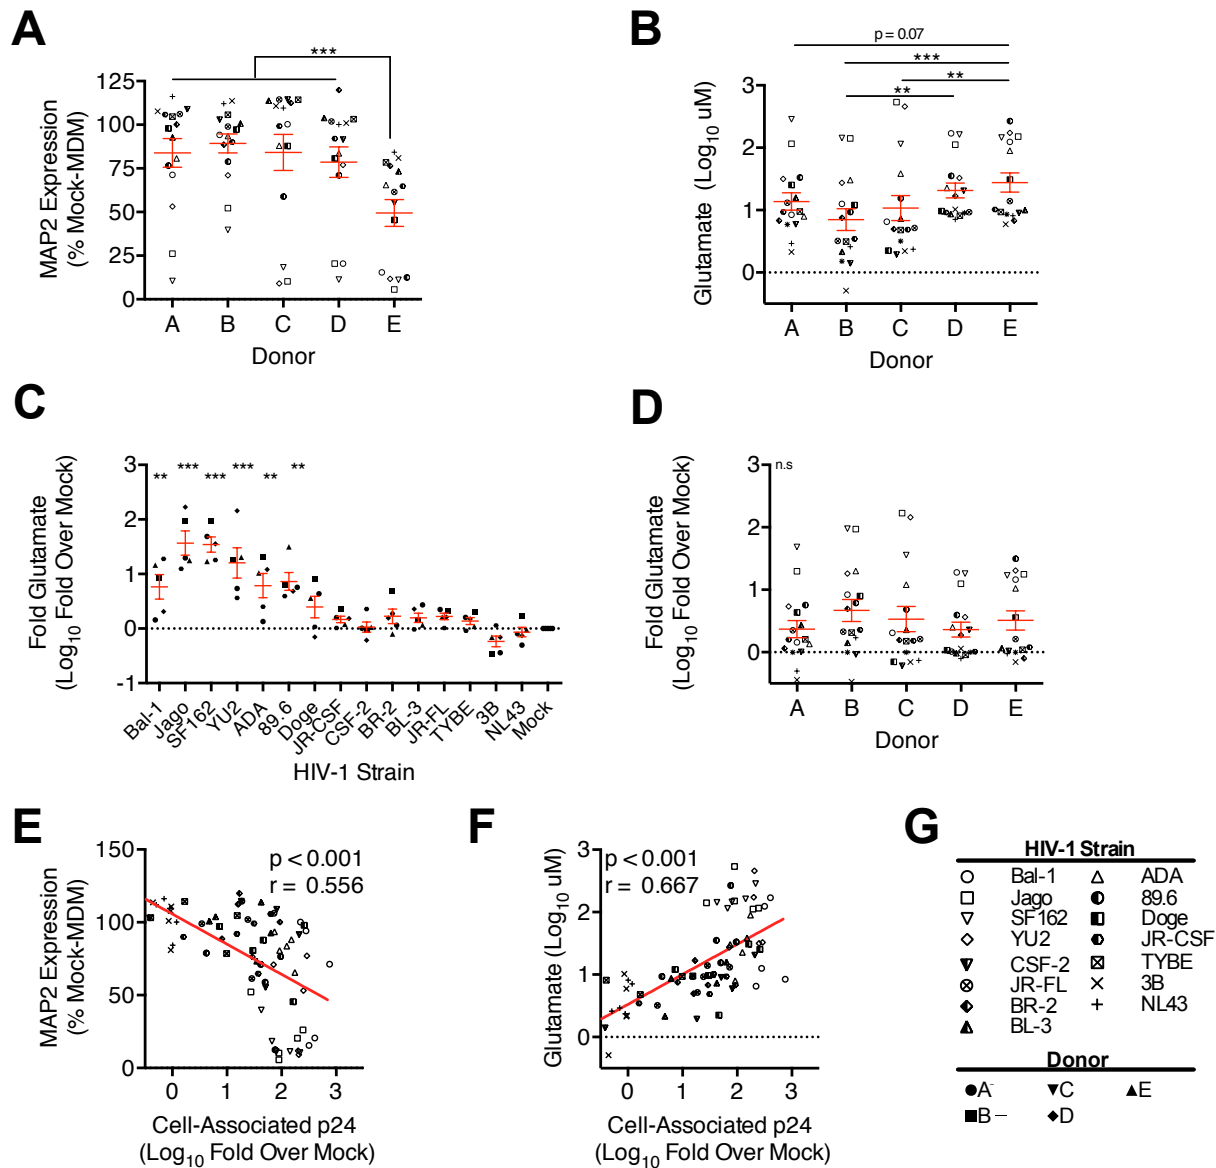

**Supplemental Figure 3: HIV replication in macrophages increases extracellular glutamate and associated neurotoxicity.** Neurotoxicity of MDM supernatants was assessed on day 12 post HIV infection by quantification of total microtubule associated protein-2 (MAP2) expression in a cell-based ELISA where primary rat cortical neurons are exposed to HIV-MDM supernatants (1:20 dilution). Glutamate levels were quantified in the same supernatants by Amplex Red Glutamate Assay. **A)** Supernatant neurotoxicity as measured by MAP2 ELISA normalized to Mock-MDM and **B)** supernatant glutamate concentration across 15 HIV-1 strains stratified by donor. Fold supernatant glutamate levels in 5 donors stratified **C)** by strain and **D)** by donor normalized to Mock-MDM supernatant glutamate. Correlation between cell-associated HIV p24 protein expression as measured by Western blot (normalized to GAPDH) and supernatant **E)** neurotoxicity as measured by MAP2 ELISA and **F)** glutamate concentration. **G)** Key for HIV strain and MDM donor symbols. Error bars indicate mean  $\pm$  SEM. Statistical comparisons to Mock-MDM and between donors were made by two-way ANOVA with Holm-Sidak post hoc test. Correlations were assessed by Pearson's correlation with line of best fit determined by linear regression. \*\*  $p < 0.01$ , \*\*\*  $p < 0.001$

**A**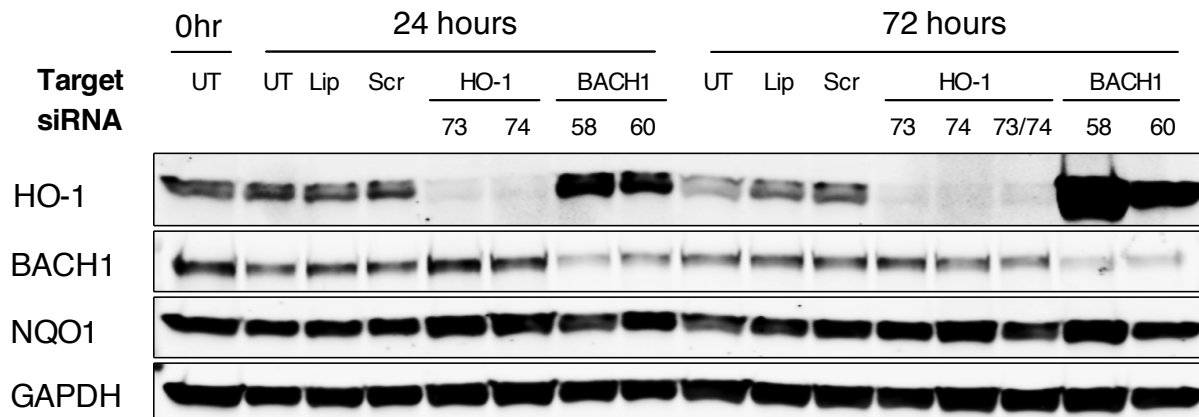**B**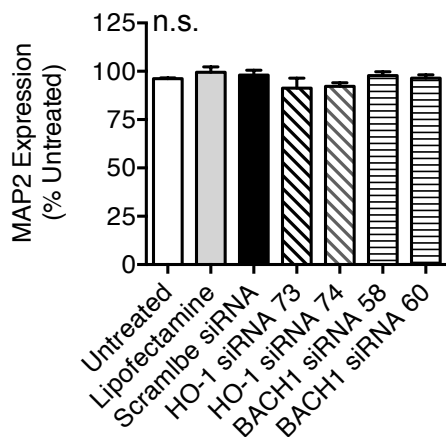**C**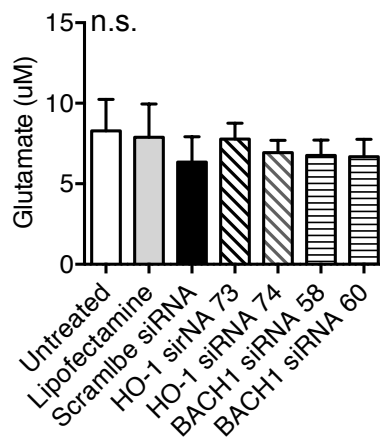

**Supplemental Figure 4: Targeted siRNA knockdown of HO-1 or the HO-1 repressor BACH1 in uninfected MDM does not alter supernatant neurotoxicity or glutamate content.** MDM from 4 independent donors were transfected using Lipofectamine RNAiMax with 50nM of siRNA targeting either HO-1 or BACH1. Two distinct Silencer Select (Ambion) siRNAs targeting HO-1, s6673 (73) and s6674 (74), or BACH1, s1859 (59) and s1860 (60), were used independently to efficiently knockdown or derepress HO-1, respectively. Additional MDM were either left untreated (UT), exposed to lipofectamine (Lip), or transfected with scramble siRNA (Scr; #4390856 Ambion). **A**) Representative Western blot for HO-1, BACH1, NQO1, and GAPDH at 24 hours and 72 hours post transfection with select siRNAs. MDM supernatant **B**) neurotoxicity as measured by MAP2 ELISA and **C**) glutamate content 72 hours post transfection. Errors bars indicate mean  $\pm$  SEM (n = 4). Statistical comparisons to Mock-MDM were made by one-way ANOVA with Holm-Sidak post hoc test. n.s. = not significant.

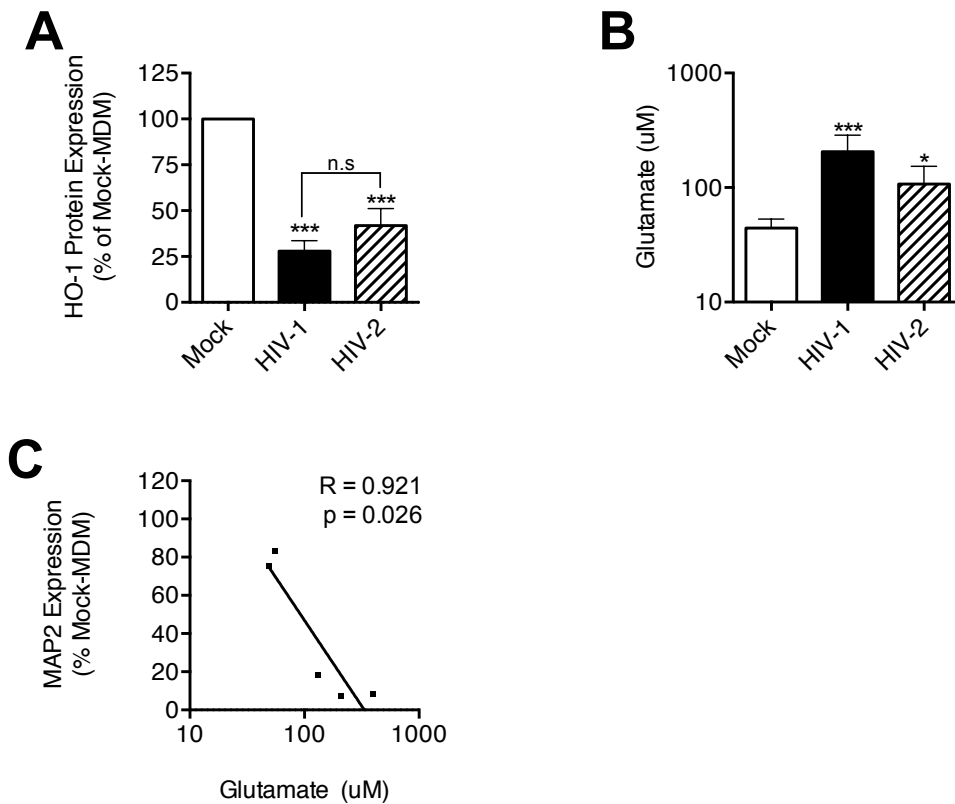

**Supplemental Figure 5: HIV-2 replication in MDM induces HO-1 deficiency and associated extracellular glutamate and supernatant neurotoxicity.** MDM from 8 independent donors were infected with either HIV-2 CBL-20 or HIV-1 89.6. Supernatants and MDM lysates were analyzed from day 12 post infection. HIV-2 infection of MDM from 5 of 8 donors demonstrated significant HIV-2 replication above background as determined by supernatant RT activity and were further analyzed. **A**) HO-1 protein expression normalized to GAPDH as determined by Western blot densitometry analysis. **B**) Supernatant glutamate content as determined by Amplex Red Assay. **C**) Correlation between supernatant glutamate content and MAP2 ELISA neurotoxicity from day 12 post infection supernatants from HIV-2 infected MDM. Errors bars indicate mean  $\pm$  SEM (n = 5). Statistical comparisons to Mock-MDM were made by one-way ANOVA with Holm-Sidak post hoc test. Correlations were assessed by Pearson's correlation with line of best fit determined by linear regression. \*  $p < 0.05$ , \*\*\*  $p < 0.001$

| Donor/Source | Strain | Swarm v. Molecular Clone | Co-receptor Usage | Tissue Isolated From | Clinical Diagnoses                    | Reference |
|--------------|--------|--------------------------|-------------------|----------------------|---------------------------------------|-----------|
| A            | Jago   | Swarm                    | CCR5              | CSF                  | AIDS Dementia Complex Stage 0.5       | (1)       |
| B            | Doge   | Swarm                    | CCR5              | CSF                  | AIDS Dementia Complex Stage 1         | (1)       |
| C            | TYBE   | Swarm                    | CXCR4             | CSF                  | CMV Encephalitis                      | (1, 2)    |
| D            | BR-2   | Swarm                    | CCR5              | Brain                | Progressive Dementia                  | (3, 4)    |
| D            | CSF-2  | Swarm                    | CCR5              | CSF                  | Progressive Dementia                  | (3, 4)    |
| E            | BL-3   | Swarm                    | CXCR4             | PBMC                 |                                       | (5)       |
| F            | SF162  | Swarm                    | CCR5              | CSF                  | Toxoplasmosis, Acute Meningitis       | (6, 7)    |
| G            | JR-FL  | Swarm                    | CCR5              | Frontal Lobe         | AIDS Encephalopathy, Kaposi's Sarcoma | (8, 9)    |
| G            | JR-CSF | Swarm                    | CCR5              | CSF                  | AIDS Encephalopathy, Kaposi's Sarcoma | (8, 9)    |
| H            | 89.6   | Clone                    | CCR5/ CXCR4       | Blood                | AIDS with no neurological disease     | (9, 10)   |
| I            | NL43   | Clone                    | CXCR4             | Blood/ bone marrow   | AIDS and non-AIDS                     | (11)      |
| I            | 3B     | Swarm                    | CXCR4             | Blood/ bone marrow   | AIDS and non-AIDS                     | (12, 13)  |
| J            | YU2    | Clone                    | CCR5              | Brain                | HIV-1 Associated Encephalopathy       | (14)      |
| K            | Bal-1  | Swarm                    | CCR5              | Lung                 | Pediatric patient with AIDS           | (15)      |
| L            | ADA    | Swarm                    | CCR5              | Blood                | Kaposi's Sarcoma                      | (16)      |

**Supplemental Table 1:** Characteristics of select HIV-1 strains provided by the Center for AIDS Research Virology Core at the Perelman School of Medicine at the University of Pennsylvania, Philadelphia, PA, USA.

| Primary Antibody  | Host Species | Mono- or Polyclonal | Provider                | Catlog # | Dilution Used | Final Antibody Concentration | kDa of Band Quantified |
|-------------------|--------------|---------------------|-------------------------|----------|---------------|------------------------------|------------------------|
| GAPDH             | mouse        | monoclonal          | Advanced Immunochemical | Mab 6C5  | 1:30000       | 0.260 µg/ml                  | 35 kDa                 |
| HIV1 p24          | mouse        | monoclonal          | Abcam                   | ab9071   | 1:1000        | 1.35 µg/ml                   | 24 kDa                 |
| HO-1 <sup>#</sup> | rabbit       | polyclonal          | Enzo Life Sciences      | SPA-896  | 1:500         | 2.0 µg/ml                    | 29 kDa                 |
| HO-2              | rabbit       | polyclonal          | Enzo Life Sciences      | SPA-897  | 1:500         | 2.0 µg/ml                    | 35 kDa                 |

**Supplemental Table 2:** Primary antibodies for western blotting.

| Secondary Antibody               | Host Species | Provider | Catlog #  | Dilution Used | Final Antibody Concentration |
|----------------------------------|--------------|----------|-----------|---------------|------------------------------|
| IRDye 680RD Goat Anti-Mouse IgG  | goat         | Licor    | 926-68070 | 1:20000       | 0.050 µg/ml                  |
| IRDye 680RD Goat Anti-Rabbit IgG | goat         | Licor    | 926-68071 | 1:20000       | 0.050 µg/ml                  |
| IRDye 800CW Goat Anti-Mouse IgG  | goat         | Licor    | 926-32210 | 1:15000       | 0.067 µg/ml                  |
| IRDye 800CW Goat Anti-Rabbit IgG | goat         | Licor    | 926-32211 | 1:15000       | 0.067 µg/ml                  |

**Supplemental Table 3:** Secondary antibodies for Western blotting.

| Human Gene   | Company            | Primer and Probe Set Catalog # |
|--------------|--------------------|--------------------------------|
| GAPDH        | Applied Biosystems | Hs0275899_g1                   |
| HMOX1 (HO-1) | Applied Biosystems | Hs01110250_m1                  |
| HMOX2 (HO-2) | Applied Biosystems | Hs00909233_m1                  |

**Supplemental Table 4:** RT-PCR Primer and Probe Sets

## Supplemental References

1. **Chen W, Sulcove J, Frank I, Jaffer S, Ozdener H, Kolson DL.** 2002. Development of a human neuronal cell model for human immunodeficiency virus (HIV)-infected macrophage-induced neurotoxicity: apoptosis induced by HIV type 1 primary isolates and evidence for involvement of the Bcl-2/Bcl-xL-sensitive intrinsic apoptosis pathway. *J Virol* **76**:9407-9419.
2. **Yi Y, Chen W, Frank I, Cutilli J, Singh A, Starr-Spires L, Sulcove J, Kolson DL, Collman RG.** 2003. An unusual syncytia-inducing human immunodeficiency virus type 1 primary isolate from the central nervous system that is restricted to CXCR4, replicates efficiently in macrophages, and induces neuronal apoptosis. *J Neurovirol* **9**:432-441.
3. **Mirra SS, Anand R, Spira TJ.** 1986. HTLV-III/LAV infection of the central nervous system in a 57-year-old man with progressive dementia of unknown cause. *N Engl J Med* **314**:1191-1192.
4. **Anand R, Thayer R, Srinivasan A, Nayyar S, Gardner M, Luciw P, Dandekar S.** 1989. Biological and molecular characterization of human immunodeficiency virus (HIV-1BR) from the brain of a patient with progressive dementia. *Virology* **168**:79-89.
5. **Rana S, Besson G, Cook DG, Rucker J, Smyth RJ, Yi Y, Turner JD, Guo HH, Du JG, Peiper SC, Lavi E, Samson M, Libert F, Liesnard C, Vassart G, Doms RW, Parmentier M, Collman RG.** 1997. Role of CCR5 in infection of primary macrophages and lymphocytes by macrophage-tropic strains of human



- immunodeficiency virus: resistance to patient-derived and prototype isolates resulting from the delta ccr5 mutation. *J Virol* **71**:3219-3227.
6. **Cheng-Mayer C, Levy JA.** 1988. Distinct biological and serological properties of human immunodeficiency viruses from the brain. *Ann Neurol* **23 Suppl**:S58-61.
  7. **Hollander H, Levy JA.** 1987. Neurologic abnormalities and recovery of human immunodeficiency virus from cerebrospinal fluid. *Ann Intern Med* **106**:692-695.
  8. **Koyanagi Y, Miles S, Mitsuyasu RT, Merrill JE, Vinters HV, Chen IS.** 1987. Dual infection of the central nervous system by AIDS viruses with distinct cellular tropisms. *Science* **236**:819-822.
  9. **Yi Y, Isaacs SN, Williams DA, Frank I, Schols D, De Clercq E, Kolson DL, Collman RG.** 1999. Role of CXCR4 in cell-cell fusion and infection of monocyte-derived macrophages by primary human immunodeficiency virus type 1 (HIV-1) strains: two distinct mechanisms of HIV-1 dual tropism. *J Virol* **73**:7117-7125.
  10. **Collman R, Balliet JW, Gregory SA, Friedman H, Kolson DL, Nathanson N, Srinivasan A.** 1992. An infectious molecular clone of an unusual macrophage-tropic and highly cytopathic strain of human immunodeficiency virus type 1. *J Virol* **66**:7517-7521.
  11. **Adachi A, Gendelman HE, Koenig S, Folks T, Willey R, Rabson A, Martin MA.** 1986. Production of acquired immunodeficiency syndrome-associated retrovirus in human and nonhuman cells transfected with an infectious molecular clone. *J Virol* **59**:284-291.

12. **Popovic M, Sarngadharan MG, Read E, Gallo RC.** 1984. Detection, isolation, and continuous production of cytopathic retroviruses (HTLV-III) from patients with AIDS and pre-AIDS. *Science* **224**:497-500.
13. **Popovic M, Read-Connole E, Gallo RC.** 1984. T4 positive human neoplastic cell lines susceptible to and permissive for HTLV-III. *Lancet* **2**:1472-1473.
14. **Li Y, Kappes JC, Conway JA, Price RW, Shaw GM, Hahn BH.** 1991. Molecular characterization of human immunodeficiency virus type 1 cloned directly from uncultured human brain tissue: identification of replication-competent and -defective viral genomes. *J Virol* **65**:3973-3985.
15. **Gartner S, Markovits P, Markovitz DM, Kaplan MH, Gallo RC, Popovic M.** 1986. The role of mononuclear phagocytes in HTLV-III/LAV infection. *Science* **233**:215-219.
16. **Gendelman HE, Orenstein JM, Martin MA, Ferrua C, Mitra R, Phipps T, Wahl LA, Lane HC, Fauci AS, Burke DS, et al.** 1988. Efficient isolation and propagation of human immunodeficiency virus on recombinant colony-stimulating factor 1-treated monocytes. *J Exp Med* **167**:1428-1441.
